# Supplementary material for: Detection of Clinical and Subclinical Lumpy Skin Disease Using Ear Notch Testing and Skin Biopsies
Source: MDPI journal article supplement (doi:10.3390/microorganisms9102171), 2021-10-19
Supplement: s1 [file s1]

**Table S1:** The immunoperoxidase monolayer assay (IPMA) scoring for all animals in both animal experiments. The IPMA scoring is expressed as strong positive, positive or weak positive and indicated with a colour code as shown at the bottom of the table.

|        | R01               |       | R02  |       | R03        |       | R04  |       | R05             |       | R06  |       | R07        |       | R08  |       | R09          |       | R10  |       |
|--------|-------------------|-------|------|-------|------------|-------|------|-------|-----------------|-------|------|-------|------------|-------|------|-------|--------------|-------|------|-------|
|        | 1/50              | 1/300 | 1/50 | 1/300 | 1/50       | 1/300 | 1/50 | 1/300 | 1/50            | 1/300 | 1/50 | 1/300 | 1/50       | 1/300 | 1/50 | 1/300 | 1/50         | 1/300 | 1/50 | 1/300 |
| 0 dpi  | N                 | N     | N    | N     | N          | N     | N    | N     | N               | N     | N    | N     | N          | N     | N    | N     | N            | N     | N    | N     |
| 5 dpi  | N                 | N     | N    | N     | N          | N     | N    | N     | N               | N     | N    | N     | N          | N     | N    | N     | N            | N     | N    | N     |
| 6 dpi  | N                 | N     | N    | N     | N          | N     | N    | N     | N               | N     | N    | N     | N          | N     | N    | N     | N            | N     | N    | N     |
| 7 dpi  | N                 | N     | N    | N     | N          | N     | N    | N     | N               | N     | N    | N     | N          | N     | N    | N     | N            | N     | N    | N     |
| 8 dpi  | N                 | N     | P    | N     | N          | N     | N    | N     | N               | N     | N    | N     | N          | N     | N    | N     | N            | N     | N    | N     |
| 9 dpi  | P                 | N     | P    | N     | P          | N     | N    | N     | P               | N     | N    | N     | N          | N     | N    | N     | N            | N     | N    | N     |
| 12 dpi | P                 | P     | P    | P     | P          | P     | P    | N     | P               | P     | P    | P     | P          | P     | P    | N     | P            | P     | P    | P     |
| 14 dpi | P                 | P     | P    | P     | P          | P     | P    | N     | P               | P     | P    | P     | P          | P     | P    | N     | P            | P     | P    | P     |
| 16 dpi | P                 | P     | †    | †     | P          | P     | P    | N     | P               | P     | P    | P     | P          | P     | P    | P     | P            | P     | P    | P     |
| 19 dpi | P                 | P     | †    | †     | P          | P     | P    | P     | P               | P     | P    | P     | P          | P     | P    | P     | P            | P     | P    | P     |
| 21 dpi | P                 | P     | †    | †     | P          | P     | P    | P     | P               | P     | P    | P     | †          | †     | †    | †     | †            | †     | P    | P     |
|        | P Strong Positive |       |      |       | P Positive |       |      |       | P Weak positive |       |      |       | N Negative |       |      |       | † Euthanasia |       |      |       |
